# Supplementary material for: Nuclear pore assembly proceeds by an inside-out extrusion of the nuclear envelope
Source: eLife. 2016 Sep 15;5:e19071. doi: 10.7554/eLife.19071 (PMC5065316; doi:10.7554/eLife.19071)
Supplement: Figure 2—source data 1. — DOI: http://dx.doi.org/10.7554/eLife.19071.010 [file elife-19071-fig2-data1.xlsx]

## Sheet: Sheet1
	Data for Figure 2C							Data for Figure 2D							Data for Figure 2E													Data for Figure 2F
	19 min	28 min	53 min	Fusion	ONM/INM distance			19 min	28 min	53 min	Fusion	Mature pore			19 min				28 min				53 min					19 min				28 min				53 min
															Non-core	Inner-core	Outer-core		Non-core	Inner-core	Outer-core		Non-core	Inner-core	Outer-core			Non-core	Inner-core	Outer-core		Non-core	Inner-core	Outer-core		Non-core	Inner-core	Outer-core
	14.069	23.1593	15.0229	25.8827	26.0503			45.3114	58.3222	53.1426	60.8333	74.5298			12.7568	9.4824	14.9539		17.4426	27.5391	23.1593		20.3926	18.8819	15.0229			45.025	41.7986	61.1238		49.3235	49.3235	58.3222		53.3819	61.7979	53.1426
	14.9539	26.2408	17.4203	22.4112	21.26			61.1238	48.2741	61.0624	61.6668	72.1054			17.2184	13.4155	16.4287		25.4409	12.724	26.2408		20.7453	12.3254	17.4203			52.2315	57.1232	53.587		57.4032	41.3181	48.2741		55.4493	49.2482	61.0624
	16.4287	22.7947	16.6348	34.7732	25.3725			53.587	45.5909	56.3988	61.532	72.1327				21.3724	26.7171		21.1945	20.217	22.7947		27.7398	28.1086	16.6348				54.2546	56.3898		46.6996	52.6526	45.5909		63.3073	59.8947	56.3988
	26.7171	17.5697	23.7244	29.6686	30.251			56.3898	55.2868	59.6703	56.9667	67.5417				17.2296	18.165		22.9392	17.6324	17.5697		33.8281	22.6981	23.7244				53.8822	57.9445		55.0521	55.4031	55.2868		61.8466	61.021	59.6703
	18.165	16.5524	25.3195	28.1292	29.1883			57.9445	52.7034	63.5973	60.2206	73.588				16.4596	29.228		14.9514	21.8272	16.5524		15.4148	26.4569	25.3195				49.5795	45.1622		50.1635	51.1588	52.7034		53.8801	59.8585	63.5973
	29.228	12.4065	29.0848		25.2636			45.1622	51.5941	66.7395		73.2163				12.8642	20.3216		25.6718	15.5876	12.4065		20.8086	23.4955	29.0848				43.1328	55.5051		51.1848	55.5911	51.5941		61.5411	57.8887	66.7395
	20.3216	29.4902	18.3379		22.684			55.5051	57.9604	59.82		71.3959				12.4932	19.4878			14.7768	29.4902		14.904	22.0702	18.3379				51.578	58.2495			53.5046	57.9604		53.4819	52.845	59.82
	19.4878	26.0097	17.4401		18.4025			58.2495	56.5097	49.1265		66.9687				11.8568	13.6229			24.7039	26.0097		20.2602	24.0428	21.9319				50.3562	41.9061			62.5811	56.5097		62.3899	53.7228	62.5004
	13.6229	25.5468	12.3407		26.624			41.9061	61.931	37.3633		70.5359				10.5779	12.5206			18.3238	25.5468			23.739	10.463				44.9243	51.9886			62.7873	61.931			60.2732	49.6645
	12.5206	31.0848	21.9319		21.6909			51.9886	58.6251	62.5004		68.2047				21.5131	12.4251			32.7105	31.0848			24.2062	15.9805				58.1044	50.4288			56.7248	58.6251			59.231	48.0937
	12.4251	16.8129	10.463		28.0329			50.4288	54.8441	49.6645		63.4493				17.7456	16.1853			25.1468	16.8129			21.395	12.2081				53.5082	51.8369			58.856	54.8441			56.3699	54.6883
	16.1853	27.9876	15.9805		26.2115			51.8369	60.3576	48.0937		66.2764				13.5016	21.9605			20.2124	27.9876			18.1402	22.6737				47.2738	55.7326			54.4443	60.3576			53.3397	64.1897
	21.9605	27.3483	12.2081		29.1283			55.7326	56.6538	54.6883		66.0213				26.0867	14.7754				27.3483				25.8827				56.4945	48.4955				56.6538				60.8333
	14.7754	21.6482	22.6737		23.1853			48.4955	61.3459	64.1897		67.6914				14.0216	23.1863				21.6482				22.4112				43.8926	55.5456				61.3459				61.6668
	23.1863	25.8358	25.8827		25.5001			55.5456	57.0995	60.8333		69.374				14.7502	16.8698				25.8358								51.1872	53.5502				57.0995
	16.8698	26.6559	22.4112		26.9459			53.5502	55.1513	61.6668		68.3859				22.4162	18.8158				26.6559								41.3317	49.6702				55.1513
	18.8158	16.9151	20.3926		25.6403			49.6702	42.5708	53.3819		67.0862				10.1368	12.0272				16.9151								43.4871	53.6971				42.5708
	12.0272	20.0918	20.7453		23.639			53.6971	49.1153	55.4493		67.7537				15.7262	13.4193				20.0918								48.6749	40.3121				49.1153
	13.4193	18.2662	27.7398		27.0188			40.3121	40.1829	63.3073		69.8668				18.8353	16.2533				18.2662								59.036	51.8477				40.1829
	16.2533	20.1939	11.7352		32.2578			51.8477	54.7131	57.2559		68.8776				16.5172	17.3043												47.3689	51.0055
	17.3043	14.7678	24.2232		32.6959			51.0055	49.0777	53.4396		69.1466				20.439	13.158												55.7478	39.466
	13.158	20.742	20.7341		29.4155			39.466	49.5227	56.0178		69.4793					21.5663													49.135
	21.5663	15.8319	33.8281		28.2247			49.135	40.2841	61.8466		58.8738					16.3925													53.0807
	16.3925	17.4426	15.4148		30.2105			53.0807	49.3235	53.8801		62.435
	12.7568	26.5344	20.8086		24.3097			45.025	54.606	61.5411		68.2294
	17.2184	25.4409	14.904		24.3033			52.2315	57.4032	53.4819		68.056
	9.4824	22.59	20.2602		26.1703			41.7986	62.1748	62.3899		73.4151
	13.4155	23.9745	18.8819		25.4406			57.1232	64.9276	61.7979		72.9727
	21.3724	21.1945	12.3254		27.8343			54.2546	46.6996	49.2482		72.7067
	17.2296	22.9392	28.1086		21.9918			53.8822	55.0521	59.8947		72.9348
	16.4596	14.9514	22.6981		33.472			49.5795	50.1635	61.021		73.0902
	12.8642	25.6718	26.4569		26.0404			43.1328	51.1848	59.8585		69.4874
	12.4932	27.5391	23.4955		23.362			51.578	49.3235	57.8887		75.8333
	11.8568	12.724	22.0702		32.2003			50.3562	41.3181	52.845		70.9341
	10.5779	20.217	24.0428		28.1162			44.9243	52.6526	53.7228		76.1828
	21.5131	17.6324	23.739		32.4994			58.1044	55.4031	60.2732		74.0009
	17.7456	21.8272	24.2062		42.9821			53.5082	51.1588	59.231		67.8714
	13.5016	15.5876	21.395		23.6722			47.2738	55.5911	56.3699		68.7103
	26.0867	14.7768	18.1402		25.694			56.4945	53.5046	53.3397		66.9228
	14.0216	24.7039			23.5406			43.8926	62.5811			79.1408
	14.7502	18.3238			25.2942			51.1872	62.7873			67.7408
	22.4162	32.7105			25.6378			41.3317	56.7248			69.4993
	10.1368	25.1468			23.3105			43.4871	58.856			73.8436
	15.7262	20.2124			26.3826			48.6749	54.4443			70.7074
	18.8353				21.2293			59.036				75.4417
	16.5172							47.3689
	20.439							55.7478
