# Supplementary material for: Nuclear pore assembly proceeds by an inside-out extrusion of the nuclear envelope
Source: eLife. 2016 Sep 15;5:e19071. doi: 10.7554/eLife.19071 (PMC5065316; doi:10.7554/eLife.19071)
Supplement: Figure 3—figure supplement 2—source data 1. — DOI: http://dx.doi.org/10.7554/eLife.19071.013 [file elife-19071-fig3.xlsx]

## Sheet: Sheet1
	Data for Figure 3— figure supplement 2C
	Time after AO	Surface area	S.D.
	0.166667	407.714	68.8501
	0.333333	528.411	38.259
	0.5	545.831	37.4518
	0.666667	566.526	52.5227
	0.833333	581.507	65.5439
	1	582.506	62.6391
	1.16667	604.565	60.7183
	1.33333	617.383	66.2741
	1.5	619.681	66.8265
	1.66667	625.186	62.886
	1.83333	634.396	65.1375
	2	642.106	69.1712
	2.16667	656.517	71.6507
	2.33333	660.08	71.9193
	2.5	656.246	77.5377
	2.66667	655.587	72.2511
	2.83333	656.709	69.6481
	3	664.47	74.3172
	3.16667	675.228	71.7689
	3.33333	678.823	73.9245
	3.5	684.54	74.1881
	3.66667	686.746	75.2547
	3.83333	685.802	77.6054
	4	687.849	84.1356
	4.16667	686.705	85.3358
	4.33333	691.818	95.0502
	4.5	690.868	93.2084
	4.66667	675.665	99.6046
	4.83333	680.665	97.7628
	5	686.796	100.729
	5.16667	698.335	92.9479
	5.33333	699.353	89.8904
	5.5	704.851	90.2644
	5.66667	712.664	96.69
	5.83333	713.77	97.2167
	6	709.649	98.6618
	6.16667	726.865	81.5101
	6.33333	697.134	97.704
	6.5	719.078	101.547
	6.66667	724.503	107.777
	6.83333	728.855	107.124
	7	741.204	103.363
	7.16667	723.609	101.83
	7.33333	729.572	101.349
	7.5	741.029	87.5519
	7.66667	735.417	98.8236
	7.83333	735.804	92.0857
	8	742.108	103.263
	8.16667	749.678	105.889
	8.33333	772.209	116.689
	8.5	767.184	113.535
	8.66667	771.676	122.781
	8.83333	774.736	111.693
	9	765.583	105.583
	9.16667	788.2	108.768
	9.33333	801.387	101.542
	9.5	806.47	91.7387
	9.66667	809.487	89.2928
	9.83333	804.725	93.937
	10	803.976	92.4708
	10.1667	816.307	90.3768
	10.3333	828.561	91.6461
	10.5	830.195	95.6919
	10.6667	829.121	97.6495
	10.8333	832.541	93.8999
	11	836.512	94.5512
	11.1667	838.654	91.1052
	11.3333	844.624	92.4089
	11.5	848.182	95.1392
	11.6667	849.789	93.8101
	11.8333	857.234	99.7941
	12	848.832	95.7941
	12.1667	888.867	78.987
	12.3333	881.979	70.1642
	12.5	888.788	69.8176
	12.6667	892.886	66.2676
	12.8333	893.482	65.0524
	13	898.226	61.7682
	13.1667	898.941	64.8034
	13.3333	906.659	64.4711
	13.5	909.201	62.998
	13.6667	908.75	63.1985
	13.8333	910.78	68.2165
	14	913.122	72.0622
	14.1667	918.903	67.9203
	14.3333	923.119	64.0671
	14.5	929.586	60.4289
	14.6667	932.054	68.4622
	14.8333	946.744	62.0865
	15	937.275	57.114
	15.1667	941.328	67.2301
	15.3333	946.462	60.6167
	15.5	946.85	54.7702
	15.6667	953.75	53.8044
	15.8333	954.608	54.8766
	16	971.893	44.4196
	16.1667	969.525	43.3985
	16.3333	964.674	40.1919
	16.5	963.484	39.3098
	16.6667	966.577	49.9889
	16.8333	993.876	35.0179
	17	997.54	38.4202
