# Supplementary material for: Nuclear pore assembly proceeds by an inside-out extrusion of the nuclear envelope
Source: eLife. 2016 Sep 15;5:e19071. doi: 10.7554/eLife.19071 (PMC5065316; doi:10.7554/eLife.19071)
Supplement: Figure 3—source data 1. — DOI: http://dx.doi.org/10.7554/eLife.19071.012 [file elife-19071-fig3-data1.xlsx]

## Sheet: Sheet1
	Data for Figure 3B						Data for Figure 3C															Data for Figure 3D
			Density
	< 1 h		Average	S.D.			Time after AO	19.2	24.4	28.4	36.3	42	53.2	60.8	65.6	73.6	82.9	100.2	116.4			Time after AO	19.2	24.4	28.4	36.3	42	53.2	60.8	65.6	73.6	82.9	100.2	116.4
	Non-core	mature pore	11.2968	2.20284
		Intermediate	0.964359	0.349082			Mature pore (data)	4.16017	3.16247	0.721585	3.79829	4.44463	3.69772	9.41742	5.91001	6.62832	11.0445	11.488	9.24526			Mature pore (data)	6.86838	9.63686	7.05719	6.66725	9.19817	7.94013	10.5851	7.60905	11.0596	12.749	9.03516	10.466
	Core	mature pore	5.69128	2.70337			Intermediate (data)	3.64015	2.56951	2.88634	1.68813	5.48171	2.77329	0.276983	0.656668	1.22747	0.849576	0.433511	1.15566			Intermediate (data)	5.44734	2.40922	4.96617	3.52972	2.71764	2.94919	0.278555	1.08701	0.368652	1.12491	1.80703	0.373785
		Intermediate	3.4055	1.23821
	1 - 2 h
	Non-core	mature pore	10.3778	1.42862
		Intermediate	0.89033	0.481774
	Core	mature pore	9.63232	2.03059
		Intermediate	0.807023	0.484668
	> 3 h
	Mature NE	mature pore	11.1068	0.0777183
		Intermediate	0.674333	0.449468
	> 3 h
	Mature NE (model)	mature pore	11.47	1.33
		Intermediate	0.65	0.0006
