# Supplementary material for: Nuclear pore assembly proceeds by an inside-out extrusion of the nuclear envelope
Source: eLife. 2016 Sep 15;5:e19071. doi: 10.7554/eLife.19071 (PMC5065316; doi:10.7554/eLife.19071)
Supplement: Figure 4—source data 1. — DOI: http://dx.doi.org/10.7554/eLife.19071.017 [file elife-19071-fig4-data1.xlsx]

## Sheet: Sheet1
	Data for Figure 4B									Data for Figure 4C
		Nup107				Nup358					Nup107				Nup358
		Intensity				Intensity					Intensity				Intensity
	Time after AO	Average	S.D.		Time after AO	Average	S.D.			Time after AO	Average	S.D.		Time after AO	Average	S.D.
	5	0.100742	0.0388064		5	0.0330704	0.0280696			5	0.275377	0.0720229		5	0.00142777	0.0175198
	6	0.168503	0.0695918		6	0.00400189	0.0183176			6	0.487119	0.11218		6	-0.0315362	0.0096758
	7	0.259879	0.109928		7	0.00166786	0.0197918			7	0.690771	0.100007		7	-0.0260192	0.0134026
	8	0.334421	0.118165		8	0.0151396	0.0225222			8	0.822683	0.0891622		8	0.00215297	0.0149465
	9	0.373276	0.120475		9	0.0303805	0.0277082			9	0.859807	0.0921509		9	0.0430231	0.0222813
	10	0.404113	0.127375		10	0.0647284	0.0329462			10	0.859087	0.0846271		10	0.0919312	0.0297349
	11	0.440556	0.125564		11	0.100178	0.0383646			11	0.850455	0.0863877		11	0.144848	0.0332705
	12	0.467601	0.140344		12	0.149305	0.0523823			12	0.844962	0.0914667		12	0.201499	0.0395649
	13	0.474861	0.142992		13	0.176307	0.0444814			13	0.841106	0.0915118		13	0.245619	0.0441104
	14	0.503488	0.157486		14	0.205846	0.0449741			14	0.854969	0.0936401		14	0.293368	0.0423074
	15	0.523606	0.14963		15	0.23547	0.0467681			15	0.878661	0.0913833		15	0.329209	0.0504802
	16	0.548224	0.13892		16	0.25637	0.0508257			16	0.886932	0.0893651		16	0.361401	0.0451429
	17	0.58081	0.143136		17	0.269016	0.0599639			17	0.895735	0.0876137		17	0.39173	0.0504777
	18	0.586779	0.151119		18	0.293718	0.0582689			18	0.911267	0.0832626		18	0.422597	0.0547242
	19	0.613377	0.147875		19	0.299245	0.0510494			19	0.922533	0.0931693		19	0.442627	0.0521722
	20	0.630591	0.145974		20	0.309534	0.0644206			20	0.927687	0.0887703		20	0.467103	0.0593374
	21	0.64804	0.164788		21	0.31795	0.0569921			21	0.936295	0.0935		21	0.481811	0.057025
	22	0.664264	0.148366		22	0.33249	0.061128			22	0.942181	0.0940835		22	0.508338	0.0630901
	23	0.673982	0.160234		23	0.358601	0.0609578			23	0.939883	0.101354		23	0.523011	0.0568941
	24	0.697043	0.167964		24	0.376142	0.0708129			24	0.937843	0.0975292		24	0.540115	0.0555431
	25	0.690978	0.190132		25	0.387823	0.0743501			25	0.942003	0.0933753		25	0.557191	0.058582
	26	0.700578	0.18974		26	0.394508	0.0816984			26	0.949422	0.096419		26	0.56865	0.0596972
	27	0.712371	0.195665		27	0.410411	0.0759547			27	0.956767	0.0954192		27	0.58556	0.0622393
	28	0.730677	0.188113		28	0.421578	0.0711923			28	0.959957	0.0927932		28	0.599555	0.0642977
	29	0.739105	0.199748		29	0.434534	0.0709811			29	0.961501	0.0893689		29	0.614582	0.0641766
	30	0.730848	0.172231		30	0.443398	0.0700661			30	0.956034	0.0893765		30	0.631045	0.0680916
	31	0.743118	0.168839		31	0.462513	0.0758793			31	0.960108	0.0904953		31	0.637345	0.0612624
	32	0.754873	0.205274		32	0.486372	0.0826614			32	0.965374	0.0862119		32	0.647393	0.0592984
	33	0.754378	0.170205		33	0.48762	0.0823817			33	0.96071	0.08805		33	0.656552	0.0619895
	34	0.780566	0.194432		34	0.495625	0.094845			34	0.967442	0.0808286		34	0.670227	0.0619325
	35	0.784248	0.174293		35	0.502513	0.0867284			35	0.964553	0.0776992		35	0.679793	0.0647918
	36	0.801418	0.210126		36	0.527682	0.0848945			36	0.964547	0.0734219		36	0.687733	0.0592326
	37	0.80796	0.182474		37	0.525083	0.0923683			37	0.962329	0.0667663		37	0.705469	0.0594227
	38	0.830859	0.173408		38	0.550437	0.0986616			38	0.974566	0.0687476		38	0.712251	0.0610006
	39	0.81976	0.163286		39	0.578248	0.110131			39	0.970718	0.0691014		39	0.718353	0.0656269
	40	0.819275	0.177744		40	0.569343	0.10763			40	0.969825	0.0718712		40	0.727729	0.0644877
	41	0.827175	0.153198		41	0.585595	0.10084			41	0.969566	0.067072		41	0.739376	0.059873
	42	0.84114	0.170487		42	0.59889	0.104236			42	0.967691	0.0661424		42	0.747729	0.060746
	43	0.855141	0.176235		43	0.613419	0.113651			43	0.963254	0.067957		43	0.750947	0.0533529
	44	0.870356	0.15878		44	0.629716	0.114122			44	0.967543	0.0616163		44	0.754579	0.057663
	45	0.877462	0.164429		45	0.644597	0.106649			45	0.97056	0.0669193		45	0.768753	0.055669
	46	0.899029	0.163717		46	0.661195	0.109865			46	0.983123	0.0625087		46	0.779425	0.0566204
	47	0.873078	0.148956		47	0.661555	0.111479			47	0.977945	0.0615181		47	0.780683	0.0556413
	48	0.887518	0.155289		48	0.676552	0.106728			48	0.964248	0.0530016		48	0.784753	0.0505485
	49	0.886997	0.160787		49	0.69523	0.124797			49	0.973229	0.0672141		49	0.79547	0.0534106
	50	0.876383	0.152614		50	0.706203	0.114205			50	0.974796	0.0625473		50	0.802535	0.0534786
	51	0.898077	0.140374		51	0.701652	0.120618			51	0.980968	0.0538839		51	0.806344	0.0556389
	52	0.926939	0.138392		52	0.712251	0.126383			52	0.97683	0.0596925		52	0.815466	0.0623608
	53	0.936259	0.144464		53	0.739974	0.127837			53	0.97858	0.0545398		53	0.825963	0.05861
	54	0.948307	0.143272		54	0.742521	0.123639			54	0.984567	0.0549104		54	0.830614	0.0551918
	55	0.916891	0.132922		55	0.758279	0.112938			55	0.98462	0.053453		55	0.842211	0.0506038
	56	0.954607	0.127925		56	0.766403	0.12464			56	0.986268	0.057397		56	0.847129	0.060153
	57	0.949063	0.146646		57	0.782123	0.124855			57	0.987917	0.0564866		57	0.853931	0.0539102
	58	0.957127	0.14144		58	0.789285	0.129182			58	0.991952	0.0610018		58	0.857172	0.0587626
	59	0.964228	0.131925		59	0.806977	0.11852			59	0.995921	0.0674976		59	0.854059	0.0458687
	60	0.978152	0.137907		60	0.816701	0.11714			60	0.999578	0.064053		60	0.87403	0.048536
	61	0.98751	0.125595		61	0.824926	0.104078			61	0.988067	0.0506802		61	0.866418	0.050426
	62	0.976105	0.132748		62	0.843957	0.114489			62	0.987227	0.0409631		62	0.883353	0.051506
	63	0.965475	0.124111		63	0.835044	0.102394			63	0.999044	0.0410986		63	0.88195	0.0404331
	64	0.958305	0.124553		64	0.85328	0.130213			64	0.997336	0.0527369		64	0.884695	0.0441837
	65	0.993393	0.124701		65	0.86728	0.133329			65	1.00332	0.0413751		65	0.884405	0.0387051
	66	0.972527	0.126567		66	0.852322	0.12829			66	0.998185	0.0535128		66	0.888551	0.0408133
	67	0.973276	0.119337		67	0.8453	0.137759			67	1.00442	0.0525354		67	0.901354	0.0492715
	68	0.953644	0.111622		68	0.875072	0.098797			68	1.00791	0.0548243		68	0.895885	0.0413677
	69	0.955807	0.121008		69	0.880758	0.104301			69	0.997997	0.052638		69	0.905936	0.0373732
	70	0.968874	0.122833		70	0.886653	0.0955491			70	1.00835	0.0515999		70	0.907565	0.0410226
	71	0.961387	0.129046		71	0.879847	0.117825			71	1.00377	0.0450331		71	0.904292	0.0431022
	72	0.977948	0.103967		72	0.883546	0.11183			72	1.00178	0.0501975		72	0.911691	0.0448141
	73	0.979786	0.101384		73	0.904805	0.0824554			73	1.0005	0.0440818		73	0.917388	0.0391622
	74	1.00292	0.109977		74	0.887924	0.111301			74	1.00671	0.0445593		74	0.927616	0.0356851
	75	0.992919	0.0865604		75	0.886503	0.111693			75	1.00524	0.0486314		75	0.932127	0.042477
	76	0.997484	0.105533		76	0.922861	0.116019			76	1.00476	0.0407998		76	0.9449	0.043994
	77	0.985054	0.104247		77	0.911931	0.116813			77	1.01056	0.0427829		77	0.937991	0.0368685
	78	1.02023	0.100208		78	0.901879	0.0890436			78	1.00992	0.0402149		78	0.933631	0.0376979
	79	0.983239	0.0990413		79	0.929772	0.108661			79	1.00933	0.0463953		79	0.936741	0.0314452
	80	1.00266	0.102454		80	0.937748	0.092774			80	1.01115	0.0364063		80	0.948554	0.0407268
	81	1.0123	0.111471		81	0.934272	0.0882609			81	1.00942	0.0329184		81	0.955134	0.030096
	82	1.02271	0.097053		82	0.936585	0.102045			82	1.01279	0.0313848		82	0.956062	0.0440621
	83	0.996499	0.100501		83	0.928351	0.077614			83	1.01036	0.0337793		83	0.954918	0.0358264
	84	1.00682	0.0892463		84	0.936208	0.0891797			84	1.01262	0.0345858		84	0.963564	0.0375002
	85	1.02354	0.0836423		85	0.94286	0.0939907			85	1.00983	0.0380836		85	0.955003	0.0334658
	86	1.00554	0.0920301		86	0.967245	0.0834221			86	1.01066	0.0346238		86	0.963832	0.0329693
	87	1.0132	0.0902056		87	0.976974	0.103024			87	1.00056	0.0429916		87	0.966178	0.0344016
	88	1.01127	0.0927344		88	0.971016	0.0940373			88	1.011	0.0365552		88	0.964354	0.028289
	89	1.03566	0.0878046		89	0.949204	0.0914173			89	1.00558	0.0432316		89	0.964598	0.0339065
	90	1.01094	0.106545		90	0.943455	0.0673323			90	0.993463	0.0394371		90	0.963463	0.0311025
	91	1.02275	0.0786923		91	0.946213	0.0854787			91	0.992682	0.0356102		91	0.962015	0.0294383
	92	0.996701	0.0734976		92	0.966589	0.101559			92	1.00359	0.0314425		92	0.968653	0.0268878
	93	1.01298	0.0799884		93	0.973695	0.0902022			93	1.00361	0.0345805		93	0.961498	0.0285561
	94	1.00639	0.0897831		94	0.967344	0.078622			94	1.00425	0.0311317		94	0.983231	0.0357116
	95	0.983229	0.073969		95	0.98401	0.108302			95	0.996217	0.0322074		95	0.972086	0.033505
	96	0.989932	0.0613659		96	0.979684	0.0946894			96	0.995241	0.0267332		96	0.970643	0.0352017
	97	1.02048	0.0540738		97	0.97857	0.0623376			97	1.00158	0.0293592		97	0.973714	0.0348543
	98	0.985919	0.0638716		98	0.977813	0.0599437			98	0.987165	0.0289084		98	0.982592	0.027667
	99	1.00311	0.0816579		99	0.959453	0.0568349			99	0.999383	0.0291667		99	0.987094	0.0239681
	100	0.997833	0.0750277		100	0.991496	0.054923			100	0.994823	0.0273152		100	0.996815	0.0251371
	101	1.0125	0.0757509		101	0.987917	0.0554552			101	0.998914	0.0225887		101	0.990511	0.0278459
	102	0.98645	0.0735582		102	0.983894	0.0694316			102	0.997637	0.0300169		102	0.98496	0.0295725
	103	1.00919	0.068617		103	0.986337	0.0486694			103	1.01095	0.0367385		103	0.990763	0.0364025
	104	1.00832	0.0922357		104	0.989249	0.0504457			104	0.99771	0.0354989		104	0.991578	0.029877
	105	0.987762	0.0666231		105	0.968827	0.052809			105	0.990407	0.0317143		105	0.99489	0.0252528
	106	0.984831	0.0708862		106	0.979175	0.0682208			106	0.992371	0.0357328		106	0.983824	0.02524
	107	0.988161	0.071212		107	0.990831	0.0495685			107	0.989356	0.0257183		107	0.991484	0.0147764
	108	1.01386	0.0662973		108	1.00488	0.0454791			108	0.996979	0.0285514		108	0.998395	0.0261035
	109	1.01344	0.0789048		109	0.990694	0.0523469			109	0.998566	0.0293887		109	0.995376	0.02771
	110	1.00022	0.0636234		110	0.991317	0.0471476			110	0.995572	0.0182253		110	0.999526	0.0215422
	111	1.00448	0.0612798		111	0.996392	0.0597395			111	1.00289	0.0226116		111	0.992122	0.0238583
	112	1.00355	0.0689963		112	0.988534	0.0423276			112	1.00217	0.0248127		112	0.999833	0.0247607
	113	1.00623	0.0865631		113	0.998931	0.0547015			113	1.01025	0.0187892		113	0.99196	0.0237385
	114	0.98441	0.0664865		114	1.01775	0.0677695			114	1.00014	0.0247058		114	1.01183	0.0228363
	115	1.00513	0.0814764		115	1.00763	0.0521877			115	1.00018	0.0220869		115	1.00792	0.026545
	116	0.997426	0.0862553		116	1.00742	0.0589355			116	1.00428	0.0301148		116	1.00235	0.0328781
	117	0.98909	0.0775151		117	1.00614	0.0446444			117	1.0016	0.0336005		117	1.01394	0.0317925
	118	0.990972	0.0880977		118	1.02824	0.0566802			118	1.00683	0.0360145		118	1.01241	0.0265828
	119	1.01814	0.0871132		119	1.03028	0.0590965			119	1.01885	0.0324556		119	1.02075	0.025953
	120	0.978107	0.0658727		120	1.04557	0.0738522			120	1.00895	0.0346451		120	1.02558	0.0246433
