# Supplementary material for: Nuclear pore assembly proceeds by an inside-out extrusion of the nuclear envelope
Source: eLife. 2016 Sep 15;5:e19071. doi: 10.7554/eLife.19071 (PMC5065316; doi:10.7554/eLife.19071)
Supplement: Figure 5—source data 1. — DOI: http://dx.doi.org/10.7554/eLife.19071.020 [file elife-19071-fig5-data1.xlsx]

## Sheet: Sheet1
	Data for Figure 5C
		Frequency
	< 1 h	Average	S.D.
	Non-core	0
	Core	0.181938	0.119476
	1 - 2 h
	Non-core	0.00793651	0.0194404
	Core	0.00680272	0.0179983
	> 3 h
	Mature NE	0
